# Supplementary material
Source: PubMed Central journal article supplement (PMC1639518)

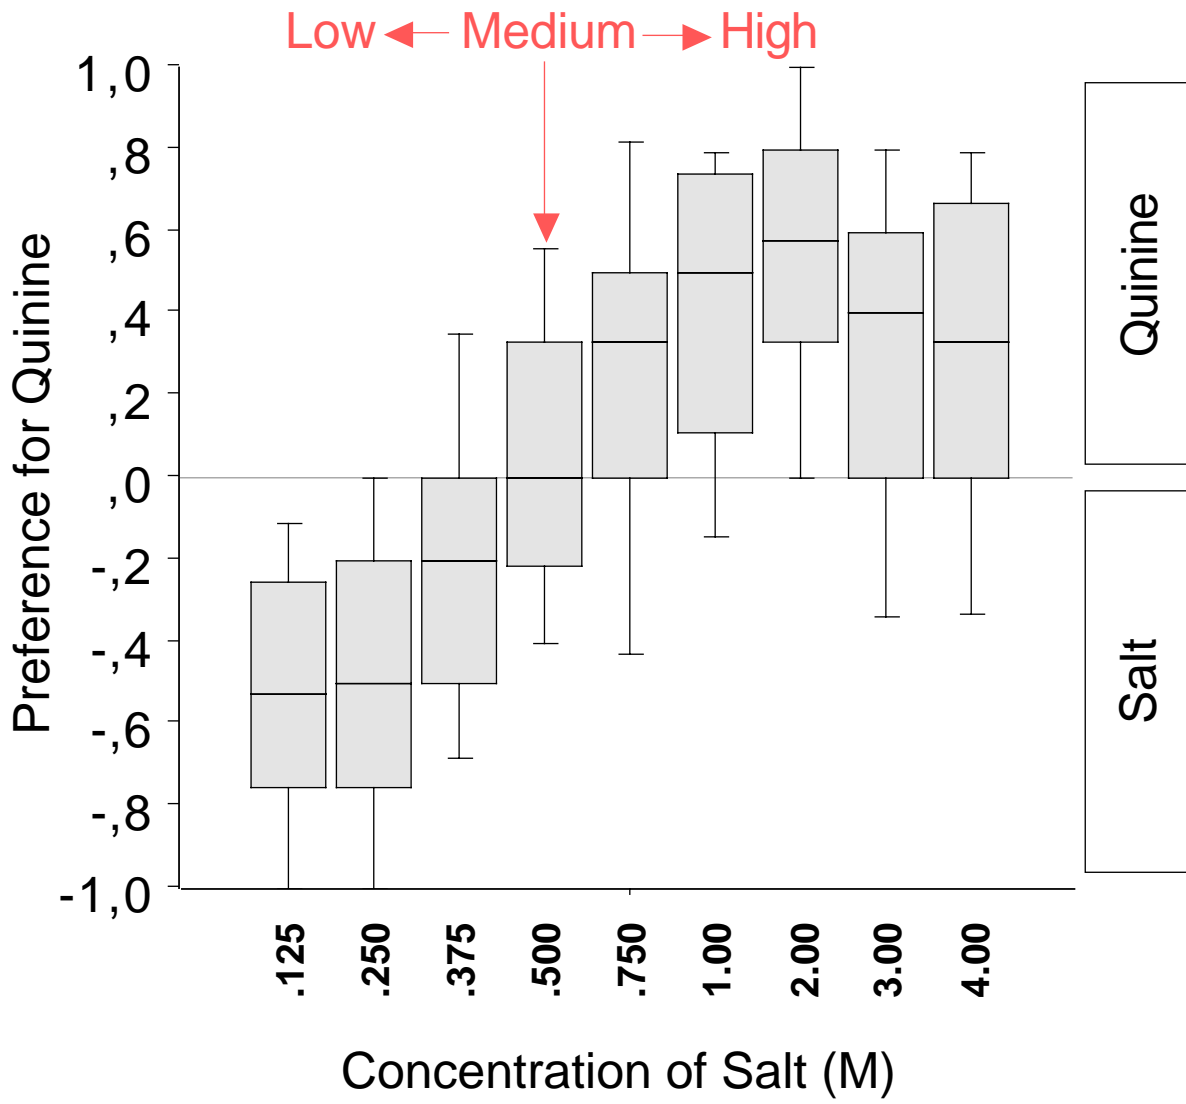

Supplement: rspb20063673s06.pdf [file rspb20063673s06.pdf]
